# Supplementary material
Source: Springer Nature journal article supplement (https://mijn.bsl.nl/resource/supplementary/13047_2009_106_MOESM18_ESM.pdf/7109804)

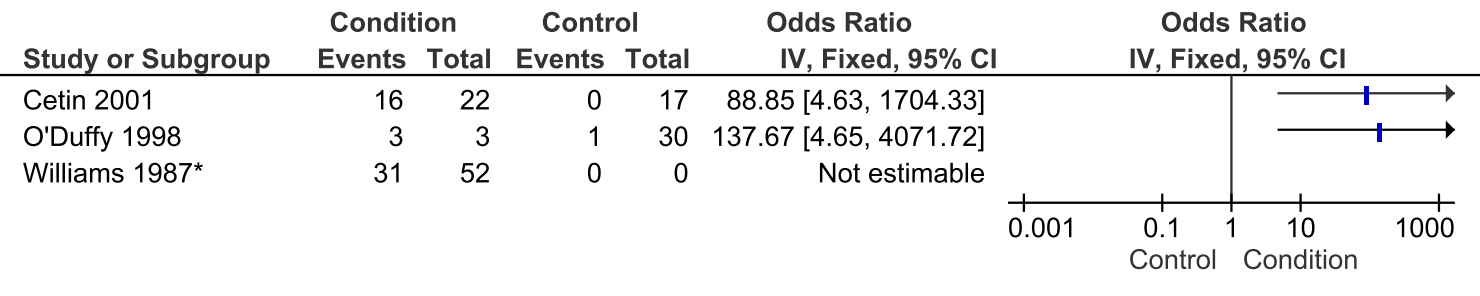

Supplement: MOESM18 [file 7109804]
